# Supplementary material
Source: PubMed Central journal article supplement (PMC8667979)
Supplement: 41577_2021_652_MOESM1_ESM.pdf [file 41577_2021_652_MOESM1_ESM.pdf]

**Supplementary information**

---

**B cells in central nervous system disease:  
diversity, locations and pathophysiology**

---

In the format provided by the  
authors and unedited

Table 1. Locations of B cells in CNS disorders

| Disease                          | Locations in the CNS |              |          |              |              |              |            |              | References |
|----------------------------------|----------------------|--------------|----------|--------------|--------------|--------------|------------|--------------|------------|
|                                  | CSF                  |              | Meninges |              | Perivascular |              | Parenchyma |              |            |
|                                  | B cells              | Plasma cells | B cells  | Plasma cells | B cells      | Plasma cells | B cells    | Plasma cells |            |
| Glioblastoma                     | ?                    | ?            | ?        | ?            | ++/+/-       | ?            | +/-        | ?            | 1          |
| Meningioma                       | ?                    | ?            | ++/+/-   | +/-          | ++/+/-       | +/-          | +/-        | +/-          | 2          |
| B cell lymphoma                  | ?                    | ?            | +++/-    | +++/+/-      | +++          | +++/+/-      | +++/-      | +++/+/-      | 3,4        |
| COVID-19                         | +++                  | +++          | ?        | ?            | ?            | ?            | ?          | ?            | 5,6        |
| CNS tropic viruses               | ?                    | ++           | ?        | +++          | +++          | +++          | +/-        | +++          | 3,7-11     |
| Bacterial encephalitis           | ++                   | ++           | ?        | ?            | ?            | ?            | ?          | ?            | 8,9,12     |
| NMO                              | +++                  | ++           | ?        | ?            | +++          | ?            | ?          | ?            | 13,14      |
| MOG antibody-associated disorder | ?                    | ?            | ?        | ?            | ++           | ?            | +          | ?            | 14         |
| Anti-NDMAR encephalomyelitis     | ++                   | ++           | +++      | +++          | +++          | +++          | +          | +++          | 15,16      |

+++ = present in abundance, ++ = present as a minor population, + = non-zero representation, - = not present  
 ? denotes uncertainty about cell numbers in this location.

Table 2. B cell subsets in the CNS of MS or its mouse models

| B cell subset                             | Locations in the CNS                |                                  |                                   |                                   | Additional details                                                                                                                                                                                                | References          |
|-------------------------------------------|-------------------------------------|----------------------------------|-----------------------------------|-----------------------------------|-------------------------------------------------------------------------------------------------------------------------------------------------------------------------------------------------------------------|---------------------|
|                                           | CSF                                 | Meninges                         | Perivascular                      | Parenchyma                        |                                                                                                                                                                                                                   |                     |
| Naïve B cells - Mouse                     | B1: +?<br>B2: ++?                   | B1: +<br>B2: +++                 | B1: +?<br>B2: ++                  | B1: -?<br>B2: +                   | - Many acquire pro-inflammatory characteristics in EAE models.                                                                                                                                                    | 17-27               |
| Naïve B cells - Human                     | B1: ++/+<br>B2: ++/+                | B1: ?<br>B2: +                   | B1: ?<br>B2: +                    | B1: -<br>B2: -                    |                                                                                                                                                                                                                   |                     |
| Memory B cells - Mouse                    | IgM: +/-?<br>IgA: +/-?<br>IgG: +/-? | IgM: +<br>IgA: -?<br>IgG: ++/+/- | IgM: +/-?<br>IgA: -?<br>IgG: +/-? | IgM: +/-?<br>IgA: -?<br>IgG: +/-? | - Strongly associated with MS progression.<br>- Most memory cells in CSF are IgM or IgG1.                                                                                                                         | 10,17,19,22-29      |
| Memory B cells - Human                    | IgM:+++/<br>IgA: +<br>IgG: ++       | IgM:+++/<br>IgA: +<br>IgG: ++    | IgM:+++/<br>IgA: +<br>IgG: ++     | IgM: +/-<br>IgA: -?<br>IgG: +     |                                                                                                                                                                                                                   |                     |
| Tbet <sup>+</sup> memory B cells* - Mice  | ?                                   | ?                                | -/+/?                             | ?                                 | -Atypical memory B cells accumulate in the brain with age                                                                                                                                                         | 27,30               |
| Tbet <sup>+</sup> memory B cells* - Human | ++                                  | ++                               | ++/?                              | +?                                | - Predicted presence in the CNS is based on the concentration of atypical memory B cells and CXCR3 <sup>+</sup> B cells within the CNS of MS patients which overlaps with the Tbet <sup>+</sup> B cell phenotype. | 24,31,32            |
| Plasma cells - Mouse                      | IgM: +?<br>IgA: +?<br>IgG: +?       | IgM: +<br>IgA: +<br>IgG: +       | IgM: +<br>IgA: +<br>IgG: +        | IgM: +<br>IgA: +<br>IgG: +        | - Most of the IgG <sup>+</sup> plasma cells are IgG1 but IgG3 plasma cells likely increase during relapses based on the isotype composition of oligoclonal bands. Small numbers of                                | 8,10,23-25,28,33-38 |
| Plasma cells - Human                      | IgM: ++/+<br>IgA: +                 | IgM: +<br>IgA: +                 | IgM: +<br>IgA: +/-                | IgM: +/-<br>IgA: +/-              |                                                                                                                                                                                                                   |                     |

|                                  |                                                    |                                                    |                                                  |                                                      |                                                                                                                                                                                                                                                                                                                                                                                                                                                                |                      |
|----------------------------------|----------------------------------------------------|----------------------------------------------------|--------------------------------------------------|------------------------------------------------------|----------------------------------------------------------------------------------------------------------------------------------------------------------------------------------------------------------------------------------------------------------------------------------------------------------------------------------------------------------------------------------------------------------------------------------------------------------------|----------------------|
|                                  | IgG: ++                                            | IgG: ++                                            | IgG: ++                                          | IgG: +                                               | IgG2 and IgG4 plasma cells likely exist as well.<br>- IgA1 is the dominant IgA isotype in CSF and lesions although IgA2 <sup>+</sup> cells can be found.<br>- Expansion of IgM <sup>+</sup> plasma cells is associated with more severe disease.<br>- Most of the plasma cells in CSF have a plasmablast phenotype.                                                                                                                                            |                      |
| Regulatory B cells - Mouse       | Breg: +?<br>IgA Plasma cell: +?                    | Breg: +++<br>IgA Plasma cell: +?                   | Breg: +/-?<br>IgA Plasma cell: +++?              | Breg: -?<br>IgA Plasma cell: +?                      | - IgA <sup>+</sup> regulatory plasma cells are gut-derived and are predominantly found in active white matter MS lesions.                                                                                                                                                                                                                                                                                                                                      | 10,21,23,39,40       |
| Regulatory B cells - Human       | Breg: ++<br>IL-10 <sup>+</sup> IgA Plasma cell: +? | Breg: ?<br>IL-10 <sup>+</sup> IgA Plasma cell: +/- | Breg: ?<br>IL-10 <sup>+</sup> IgA Plasma cell: + | Breg: ?<br>IL-10 <sup>+</sup> IgA Plasma cell: +++/+ |                                                                                                                                                                                                                                                                                                                                                                                                                                                                |                      |
| Germinal center B cells* - Mouse | -?                                                 | ++/-                                               | -                                                | -                                                    | - Predicted presence is based on evidence of somatic hypermutation occurring within the CNS, AID <sup>+</sup> B cells in follicle-like structures and CSF, grouped Ki67 <sup>+</sup> B cells in follicle-like structures and CSF, and the presence of T follicular helper cells within the CSF and MS lesions. In contrast, the master transcription factor of germinal center B cell differentiation Bcl6, is poorly represented in follicle-like structures. | 17,22,25,28,29,41-47 |
| Germinal center B cells* - Human | +/-                                                | ++/-                                               | +/-?                                             | -                                                    |                                                                                                                                                                                                                                                                                                                                                                                                                                                                |                      |

+++ = present in abundance on average, ++ = present as a minor population on average, + = non-zero representation, - = not present

\*Evidence is suggestive of the existence of these cells however not definitively proven.

? denotes uncertainty about the precise localization and cell numbers.

Table 3. B cell chemokines and survival factors in the CNS

| Chemokine(s)/ survival factor – receptor(s) | Cells affected                                                                     | Chemokine location                                                                                                                                                                   | Chemokine expression and disease associations                                                                                                                                                                                      | References                     |
|---------------------------------------------|------------------------------------------------------------------------------------|--------------------------------------------------------------------------------------------------------------------------------------------------------------------------------------|------------------------------------------------------------------------------------------------------------------------------------------------------------------------------------------------------------------------------------|--------------------------------|
| CXCL10 and CXCL9 – CXCR3                    | Plasmablasts, plasma cells, and Tbet memory B cells.                               | - Found in perivascular spaces, the meninges, and the parenchyma of MS lesions.<br>- Made by astrocytes.                                                                             | - CXCL10 is increased in CSF in RRMS and variably in progressive MS.                                                                                                                                                               | 13,32,47-51                    |
| CXCL12 – CXCR4                              | Germinal center B cells, memory B cells, plasmablasts and plasma cells.            | - Found in perivascular spaces<br>- Can be made by astrocytes and by oligodendrocyte precursor cells in EAE.                                                                         | - Increased in CSF and MS lesions<br>- Correlated with faster cortical thinning and relapses                                                                                                                                       | 17,20,37,52,53                 |
| CXCL13 – CXCR5                              | Naïve B cells, germinal center B cells, memory B cells, T follicular helper cells. | - Found in active lesions in the meninges, perivascular spaces, and the parenchyma.                                                                                                  | - Increased in MS lesions and CSF throughout the disease<br>- Correlated with disease severity, relapses, new white matter lesions, new cortical lesions, increased immunoglobulin synthesis in CSF, and faster cortical thinning. | 12,20,35,43,46,47, 49,52,54,55 |
| CCL19 – CCR7                                | Naive B cells, activated B cells, memory B cells.                                  | - Found in the meninges and to a lesser degree in perivascular cuffs and may be in the parenchyma.<br>- Expressed by astrocytes and microglia in EAE including within the parenchyma | - Increased in CSF of RRMS and SPMS patients.                                                                                                                                                                                      | 20,47,48,56-58                 |
| CCL21 – CCR7                                | Naïve B cells, activated B cells, memory B cells.                                  | - Not found in the parenchyma but small amounts of RNA are found in perivascular cuffs and the meninges.<br>- In perivascular spaces in EAE.                                         | - Present but not increased in CSF in MS.                                                                                                                                                                                          | 20,46-48,56-58                 |

|                         |                                                                     |                                                                                                                                                                                 |                                                                                          |                   |
|-------------------------|---------------------------------------------------------------------|---------------------------------------------------------------------------------------------------------------------------------------------------------------------------------|------------------------------------------------------------------------------------------|-------------------|
| CCL20 – CCR6            | B1 cells, Naïve B2 cells, Memory B cells                            | - mRNA detected in perivascular spaces and the meninges.                                                                                                                        | - Present in small amounts but not increased in CSF in MS.                               | 20,35,47,59       |
| CCL2 – CCR2             | Naïve and memory B cells.                                           | - mRNA detected in perivascular spaces and the meninges.<br>- Protein detected in the parenchyma<br>- Made by astrocytes in white matter lesions but not grey matter            | - Normal to decreased levels in CSF during MS.                                           | 35,47,48,60-62    |
| CXCL8 – CXCR1 and CXCR2 | A small portion of peripheral blood B cells                         | - Trend towards increased expression in white matter lesions.                                                                                                                   | - Increased in CSF of MS patients.                                                       | 35,52,60,63       |
| BAFF – BAFF-R and TACI  | Naïve B cells, activated B cells, memory B cells, and plasma cells. | - Found in the meninges and to a lesser extent in the perivascular spaces and parenchyma.<br>- Made by astrocytes in lesions                                                    | - Slightly increased to decreased in CSF, decreasing during periods of B cell expansion. | 12,37,47,54,64,65 |
| APRIL – BMCA and TACI   | Memory B cells, plasmablasts, and plasma cells.                     | - mRNA detected in perivascular spaces and to a lesser extent in the meninges.<br>- Made by astrocytes in EAE lesions in the meninges, perivascular spaces, and the parenchyma. | - Slightly increased in MS<br>- Correlated with relapses                                 | 12,37,47,52,64    |

## References

- 1 Lee-Chang, C. *et al.* Myeloid-Derived Suppressive Cells Promote B cell-Mediated Immunosuppression via Transfer of PD-L1 in Glioblastoma. *Cancer Immunol Res* **7**, 1928-1943, doi:10.1158/2326-6066.CIR-19-0240 (2019).
- 2 Fang, L. *et al.* The immune cell infiltrate populating meningiomas is composed of mature, antigen-experienced T and B cells. *Neuro Oncol* **15**, 1479-1490, doi:10.1093/neuonc/not110 (2013).
- 3 Kuhlmann, T., Lassmann, H. & Bruck, W. Diagnosis of inflammatory demyelination in biopsy specimens: a practical approach. *Acta Neuropathol* **115**, 275-287, doi:10.1007/s00401-007-0320-8 (2008).
- 4 Nomani, L., Cotta, C. V., Hsi, E. D., Ferry, J. A. & Cook, J. R. Extranodal Marginal Zone Lymphoma of the Central Nervous System Includes Parenchymal-Based Cases With Characteristic Features. *Am J Clin Pathol* **154**, 124-132, doi:10.1093/ajcp/aqaa032 (2020).
- 5 Heming, M. *et al.* Neurological Manifestations of COVID-19 Feature T Cell Exhaustion and Dedifferentiated Monocytes in Cerebrospinal Fluid. *Immunity* **54**, 164-175 e166, doi:10.1016/j.immuni.2020.12.011 (2021).
- 6 Song, E. *et al.* Divergent and self-reactive immune responses in the CNS of COVID-19 patients with neurological symptoms. *Cell Rep Med* **2**, 100288, doi:10.1016/j.xcrm.2021.100288 (2021).
- 7 Anlar, B. *et al.* Tissue inflammatory response in subacute sclerosing panencephalitis (SSPE). *J Child Neurol* **16**, 895-900, doi:10.1177/088307380101601206 (2001).
- 8 Cepok, S. *et al.* Short-lived plasma blasts are the main B cell effector subset during the course of multiple sclerosis. *Brain* **128**, 1667-1676, doi:10.1093/brain/awh486 (2005).
- 9 Gilden, D. H. Infectious causes of multiple sclerosis. *Lancet Neurol* **4**, 195-202, doi:10.1016/S1474-4422(05)01017-3 (2005).
- 10 Probstel, A. K. *et al.* Gut microbiota-specific IgA(+) B cells traffic to the CNS in active multiple sclerosis. *Sci Immunol* **5**, doi:10.1126/sciimmunol.abc7191 (2020).
- 11 Wuthrich, C. *et al.* Characterization of lymphocytic infiltrates in progressive multifocal leukoencephalopathy: co-localization of CD8(+) T cells with JCV-infected glial cells. *J Neurovirol* **12**, 116-128, doi:10.1080/13550280600716604 (2006).
- 12 Kowarik, M. C. *et al.* CXCL13 is the major determinant for B cell recruitment to the CSF during neuroinflammation. *J Neuroinflammation* **9**, 93, doi:10.1186/1742-2094-9-93 (2012).
- 13 Chihara, N. *et al.* Plasmablasts as migratory IgG-producing cells in the pathogenesis of neuromyelitis optica. *PLoS One* **8**, e83036, doi:10.1371/journal.pone.0083036 (2013).
- 14 Takai, Y. *et al.* Myelin oligodendrocyte glycoprotein antibody-associated disease: an immunopathological study. *Brain* **143**, 1431-1446, doi:10.1093/brain/awaa102 (2020).
- 15 Malviya, M. *et al.* NMDAR encephalitis: passive transfer from man to mouse by a recombinant antibody. *Ann Clin Transl Neurol* **4**, 768-783, doi:10.1002/acn3.444 (2017).

- 16 Martinez-Hernandez, E. *et al.* Analysis of complement and plasma cells in the brain of patients with anti-NMDAR encephalitis. *Neurology* **77**, 589-593, doi:10.1212/WNL.0b013e318228c136 (2011).
- 17 Corcione, A. *et al.* Recapitulation of B cell differentiation in the central nervous system of patients with multiple sclerosis. *Proc Natl Acad Sci U S A* **101**, 11064-11069, doi:10.1073/pnas.0402455101 (2004).
- 18 Dang, A. K., Tesfagiorgis, Y., Jain, R. W., Craig, H. C. & Kerfoot, S. M. Meningeal Infiltration of the Spinal Cord by Non-Classically Activated B Cells is Associated with Chronic Disease Course in a Spontaneous B Cell-Dependent Model of CNS Autoimmune Disease. *Front Immunol* **6**, 470, doi:10.3389/fimmu.2015.00470 (2015).
- 19 Eggers, E. L. *et al.* Clonal relationships of CSF B cells in treatment-naive multiple sclerosis patients. *JCI Insight* **2**, doi:10.1172/jci.insight.92724 (2017).
- 20 Haas, J. *et al.* The Choroid Plexus Is Permissive for a Preactivated Antigen-Experienced Memory B-Cell Subset in Multiple Sclerosis. *Front Immunol* **11**, 618544, doi:10.3389/fimmu.2020.618544 (2020).
- 21 Lehmann-Horn, K. *et al.* CNS accumulation of regulatory B cells is VLA-4-dependent. *Neurol Neuroimmunol Neuroinflamm* **3**, e212, doi:10.1212/NXI.0000000000000212 (2016).
- 22 Lovato, L. *et al.* Related B cell clones populate the meninges and parenchyma of patients with multiple sclerosis. *Brain* **134**, 534-541, doi:10.1093/brain/awq350 (2011).
- 23 Machado-Santos, J. *et al.* The compartmentalized inflammatory response in the multiple sclerosis brain is composed of tissue-resident CD8<sup>+</sup> T lymphocytes and B cells. *Brain* **141**, 2066-2082, doi:10.1093/brain/awy151 (2018).
- 24 Ramesh, A. *et al.* A pathogenic and clonally expanded B cell transcriptome in active multiple sclerosis. *Proc Natl Acad Sci U S A* **117**, 22932-22943, doi:10.1073/pnas.2008523117 (2020).
- 25 Schafflick, D. *et al.* Integrated single cell analysis of blood and cerebrospinal fluid leukocytes in multiple sclerosis. *Nat Commun* **11**, 247, doi:10.1038/s41467-019-14118-w (2020).
- 26 Tesfagiorgis, Y., Zhu, S. L., Jain, R. & Kerfoot, S. M. Activated B Cells Participating in the Anti-Myelin Response Are Excluded from the Inflamed Central Nervous System in a Model of Autoimmunity that Allows for B Cell Recognition of Autoantigen. *J Immunol* **199**, 449-457, doi:10.4049/jimmunol.1602042 (2017).
- 27 Brioschi, S. *et al.* Heterogeneity of meningeal B cells reveals a lymphopoietic niche at the CNS borders. *Science*, doi:10.1126/science.abf9277 (2021).
- 28 Beltran, E. *et al.* Intrathecal somatic hypermutation of IgM in multiple sclerosis and neuroinflammation. *Brain* **137**, 2703-2714, doi:10.1093/brain/awu205 (2014).
- 29 Lehmann-Horn, K., Wang, S. Z., Sagan, S. A., Zamvil, S. S. & von Budingen, H. C. B cell repertoire expansion occurs in meningeal ectopic lymphoid tissue. *JCI Insight* **1**, e87234, doi:10.1172/jci.insight.87234 (2016).
- 30 Schafflick, D. *et al.* Single-cell profiling of CNS border compartment leukocytes reveals that B cells and their progenitors reside in non-diseased meninges. *Nat Neurosci*, doi:10.1038/s41593-021-00880-y (2021).

- 31 Claes, N. *et al.* Age-Associated B Cells with Proinflammatory Characteristics Are Expanded in a Proportion of Multiple Sclerosis Patients. *J Immunol* **197**, 4576-4583, doi:10.4049/jimmunol.1502448 (2016).
- 32 van Langelaar, J. *et al.* Induction of brain-infiltrating T-bet-expressing B cells in multiple sclerosis. *Ann Neurol* **86**, 264-278, doi:10.1002/ana.25508 (2019).
- 33 Di Pauli, F. *et al.* Features of intrathecal immunoglobulins in patients with multiple sclerosis. *J Neurol Sci* **288**, 147-150, doi:10.1016/j.jns.2009.09.016 (2010).
- 34 Frischer, J. M. *et al.* The relation between inflammation and neurodegeneration in multiple sclerosis brains. *Brain* **132**, 1175-1189, doi:10.1093/brain/awp070 (2009).
- 35 Lepennetier, G. *et al.* Cytokine and immune cell profiling in the cerebrospinal fluid of patients with neuro-inflammatory diseases. *J Neuroinflammation* **16**, 219, doi:10.1186/s12974-019-1601-6 (2019).
- 36 Munoz, U. *et al.* Main Role of Antibodies in Demyelination and Axonal Damage in Multiple Sclerosis. *Cell Mol Neurobiol*, doi:10.1007/s10571-021-01059-6 (2021).
- 37 Pollok, K. *et al.* The chronically inflamed central nervous system provides niches for long-lived plasma cells. *Acta Neuropathol Commun* **5**, 88, doi:10.1186/s40478-017-0487-8 (2017).
- 38 Zhang, Y. *et al.* Clonal expansion of IgA-positive plasma cells and axon-reactive antibodies in MS lesions. *J Neuroimmunol* **167**, 120-130, doi:10.1016/j.jneuroim.2005.05.006 (2005).
- 39 McWilliam, O., Sellebjerg, F., Marquart, H. V. & von Essen, M. R. B cells from patients with multiple sclerosis have a pathogenic phenotype and increased LTalpha and TGFbeta1 response. *J Neuroimmunol* **324**, 157-164, doi:10.1016/j.jneuroim.2018.09.001 (2018).
- 40 Mitsdorffer, M. *et al.* Formation and immunomodulatory function of meningeal B-cell aggregates in progressive CNS autoimmunity. *Brain*, doi:10.1093/brain/awab093 (2021).
- 41 Bell, L., Lenhart, A., Rosenwald, A., Monoranu, C. M. & Berberich-Siebelt, F. Lymphoid Aggregates in the CNS of Progressive Multiple Sclerosis Patients Lack Regulatory T Cells. *Front Immunol* **10**, 3090, doi:10.3389/fimmu.2019.03090 (2019).
- 42 Kuerten, S. *et al.* Tertiary lymphoid organ development coincides with determinant spreading of the myelin-specific T cell response. *Acta Neuropathol* **124**, 861-873, doi:10.1007/s00401-012-1023-3 (2012).
- 43 Magliozzi, R. *et al.* Meningeal B-cell follicles in secondary progressive multiple sclerosis associate with early onset of disease and severe cortical pathology. *Brain* **130**, 1089-1104, doi:10.1093/brain/awm038 (2007).
- 44 Reali, C. *et al.* B cell rich meningeal inflammation associates with increased spinal cord pathology in multiple sclerosis. *Brain Pathol* **30**, 779-793, doi:10.1111/bpa.12841 (2020).
- 45 Serafini, B. *et al.* Dysregulated Epstein-Barr virus infection in the multiple sclerosis brain. *J Exp Med* **204**, 2899-2912, doi:10.1084/jem.20071030 (2007).

- 46 Serafini, B., Rosicarelli, B., Magliozzi, R., Stigliano, E. & Aloisi, F. Detection of ectopic B-cell follicles with germinal centers in the meninges of patients with secondary progressive multiple sclerosis. *Brain Pathol* **14**, 164-174, doi:10.1111/j.1750-3639.2004.tb00049.x (2004).
- 47 Veroni, C., Serafini, B., Rosicarelli, B., Fagnani, C. & Aloisi, F. Transcriptional profile and Epstein-Barr virus infection status of laser-cut immune infiltrates from the brain of patients with progressive multiple sclerosis. *J Neuroinflammation* **15**, 18, doi:10.1186/s12974-017-1049-5 (2018).
- 48 Edwards, K. R. *et al.* Feasibility of the use of combinatorial chemokine arrays to study blood and CSF in multiple sclerosis. *PLoS One* **8**, e81007, doi:10.1371/journal.pone.0081007 (2013).
- 49 Magliozzi, R. *et al.* Inflammatory intrathecal profiles and cortical damage in multiple sclerosis. *Ann Neurol* **83**, 739-755, doi:10.1002/ana.25197 (2018).
- 50 Mills Ko, E. *et al.* Deletion of astroglial CXCL10 delays clinical onset but does not affect progressive axon loss in a murine autoimmune multiple sclerosis model. *J Neuroinflammation* **11**, 105, doi:10.1186/1742-2094-11-105 (2014).
- 51 Tschén, S. I. *et al.* CNS viral infection diverts homing of antibody-secreting cells from lymphoid organs to the CNS. *Eur J Immunol* **36**, 603-612, doi:10.1002/eji.200535123 (2006).
- 52 Magliozzi, R. *et al.* The CSF Profile Linked to Cortical Damage Predicts Multiple Sclerosis Activity. *Ann Neurol* **88**, 562-573, doi:10.1002/ana.25786 (2020).
- 53 Zilkha-Falb, R., Kaushansky, N., Kawakami, N. & Ben-Nun, A. Post-CNS-inflammation expression of CXCL12 promotes the endogenous myelin/neuronal repair capacity following spontaneous recovery from multiple sclerosis-like disease. *J Neuroinflammation* **13**, 7, doi:10.1186/s12974-015-0468-4 (2016).
- 54 Puthenparampil, M. *et al.* BAFF Index and CXCL13 levels in the cerebrospinal fluid associate respectively with intrathecal IgG synthesis and cortical atrophy in multiple sclerosis at clinical onset. *J Neuroinflammation* **14**, 11, doi:10.1186/s12974-016-0785-2 (2017).
- 55 Quinn, J. L., Kumar, G., Agasing, A., Ko, R. M. & Axtell, R. C. Role of TFH Cells in Promoting T Helper 17-Induced Neuroinflammation. *Front Immunol* **9**, 382, doi:10.3389/fimmu.2018.00382 (2018).
- 56 Columba-Cabezas, S., Serafini, B., Ambrosini, E. & Aloisi, F. Lymphoid chemokines CCL19 and CCL21 are expressed in the central nervous system during experimental autoimmune encephalomyelitis: implications for the maintenance of chronic neuroinflammation. *Brain Pathol* **13**, 38-51, doi:10.1111/j.1750-3639.2003.tb00005.x (2003).
- 57 Krumbholz, M. *et al.* CCL19 is constitutively expressed in the CNS, up-regulated in neuroinflammation, active and also inactive multiple sclerosis lesions. *J Neuroimmunol* **190**, 72-79, doi:10.1016/j.jneuroim.2007.07.024 (2007).
- 58 Reif, K. *et al.* Balanced responsiveness to chemoattractants from adjacent zones determines B-cell position. *Nature* **416**, 94-99, doi:10.1038/416094a (2002).
- 59 Srikakulapu, P. *et al.* Chemokine Receptor-6 Promotes B-1 Cell Trafficking to Perivascular Adipose Tissue, Local IgM Production and Atheroprotection. *Front Immunol* **12**, 636013, doi:10.3389/fimmu.2021.636013 (2021).

- 60 Alter, A. *et al.* Determinants of human B cell migration across brain endothelial cells. *J Immunol* **170**, 4497-4505, doi:10.4049/jimmunol.170.9.4497 (2003).
- 61 Corcione, A. *et al.* Chemotaxis of human tonsil B lymphocytes to CC chemokine receptor (CCR) 1, CCR2 and CCR4 ligands is restricted to non-germinal center cells. *Int Immunol* **14**, 883-892, doi:10.1093/intimm/txf054 (2002).
- 62 Prins, M. *et al.* Discrepancy in CCL2 and CCR2 expression in white versus grey matter hippocampal lesions of Multiple Sclerosis patients. *Acta Neuropathol Commun* **2**, 98, doi:10.1186/s40478-014-0098-6 (2014).
- 63 Baranzini, S. E. *et al.* Transcriptional analysis of multiple sclerosis brain lesions reveals a complex pattern of cytokine expression. *J Immunol* **165**, 6576-6582, doi:10.4049/jimmunol.165.11.6576 (2000).
- 64 Baker, D., Pryce, G., James, L. K., Schmierer, K. & Giovannoni, G. Failed B cell survival factor trials support the importance of memory B cells in multiple sclerosis. *Eur J Neurol* **27**, 221-228, doi:10.1111/ene.14105 (2020).
- 65 Krumbholz, M. *et al.* BAFF is produced by astrocytes and up-regulated in multiple sclerosis lesions and primary central nervous system lymphoma. *J Exp Med* **201**, 195-200, doi:10.1084/jem.20041674 (2005).
